# Supplementary material for: Chemical Structure and Anticoagulant Property of a Novel Sulfated Polysaccharide from the Green Alga Cladophora oligoclada
Source: MDPI journal article supplement (doi:10.3390/md19100554), 2021-09-29
Supplement: s1 [file s1]

## SUPPLEMENTARY FIGURES

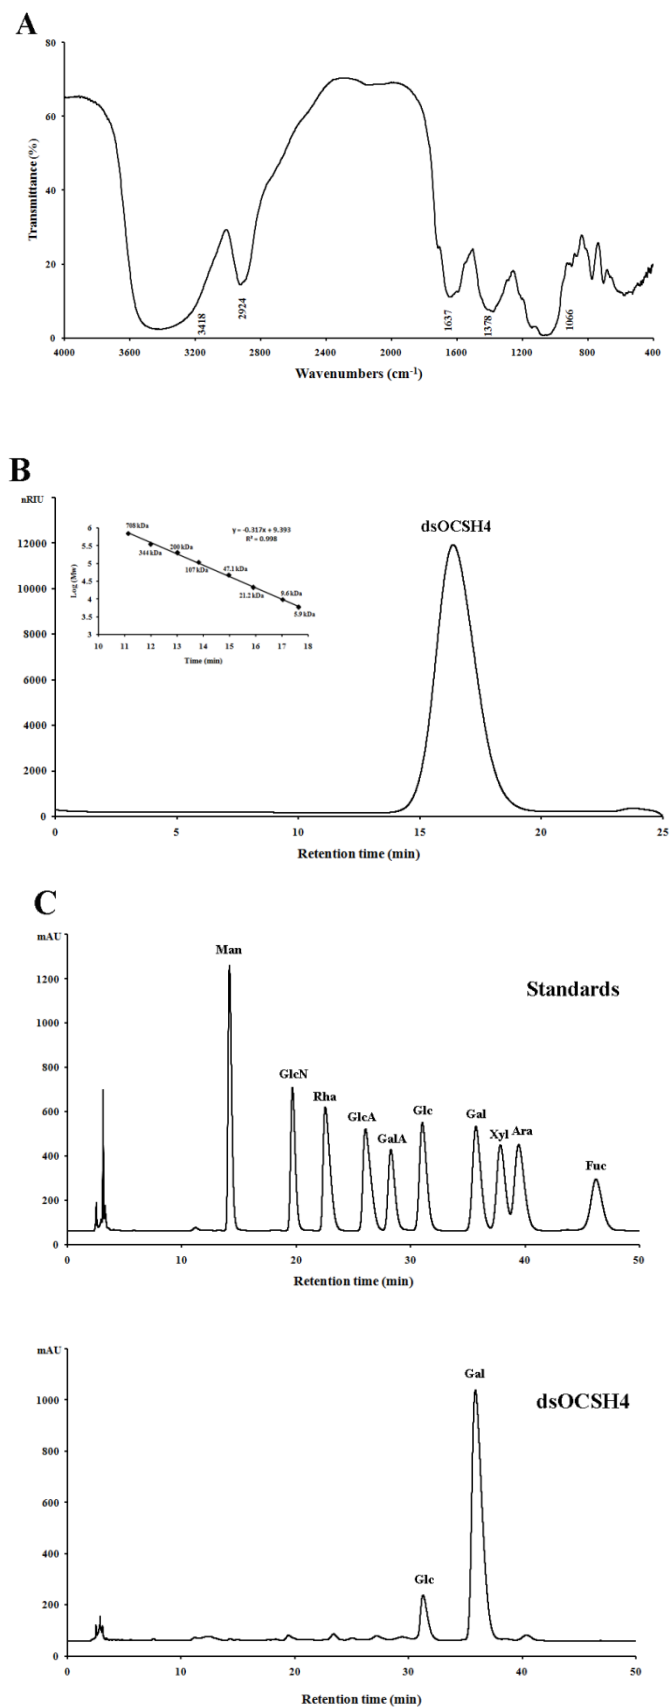

**Figure S1.** IR spectrum, HPGPC and HPLC chromatograms of dsOCSH4. (A) IR spectrum of dsOCSH4; (B) HPGPC chromatogram of dsOCSH4 on a Shodex OHpak SB-804 HQ

column and the standard curve of molecular weight; and **(C)** HPLC chromatogram for monosaccharide composition analysis of dsOCSH4 (Man: D-mannose, GlcN: D-glucosamine, Rha: L-rhamnose, GlcA: D-glucuronic acid, GalA: D-galacturonic acid, Glc: D-glucose, Gal: D-galactose, Xyl: D-xylose, Ara: L-arabinose, Fuc: L-fucose).

## <sup>1</sup>H NMR

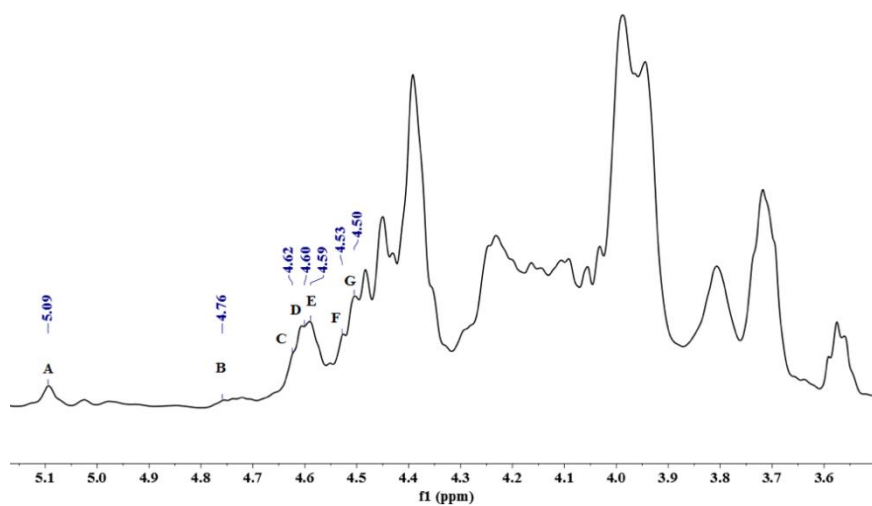

## <sup>13</sup>C NMR

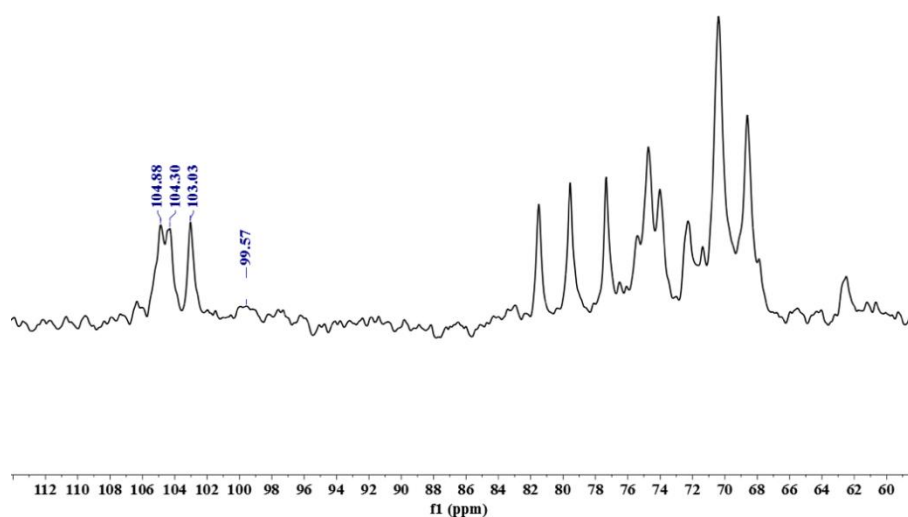

# $^1\text{H}$ - $^1\text{H}$ COSY

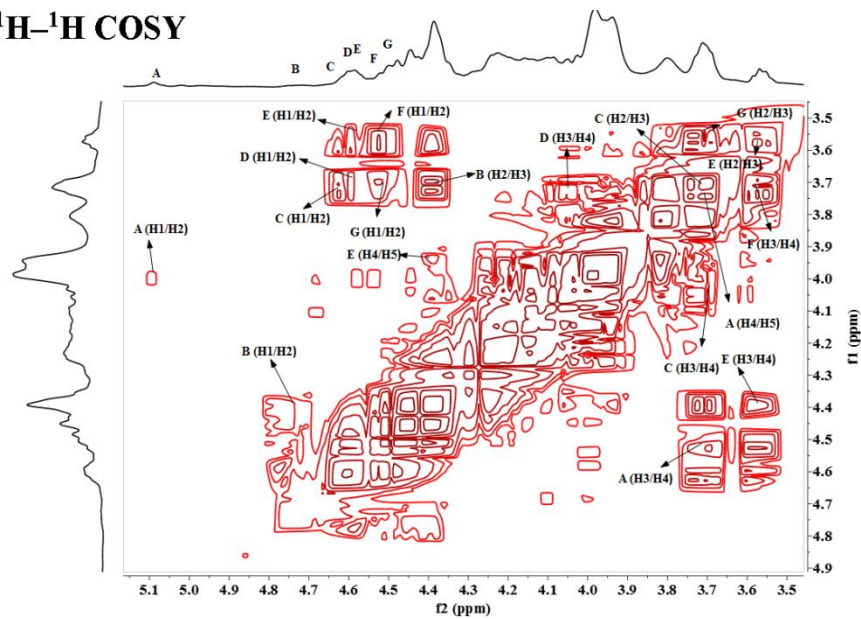

# $^1\text{H}$ - $^{13}\text{C}$ HSQC

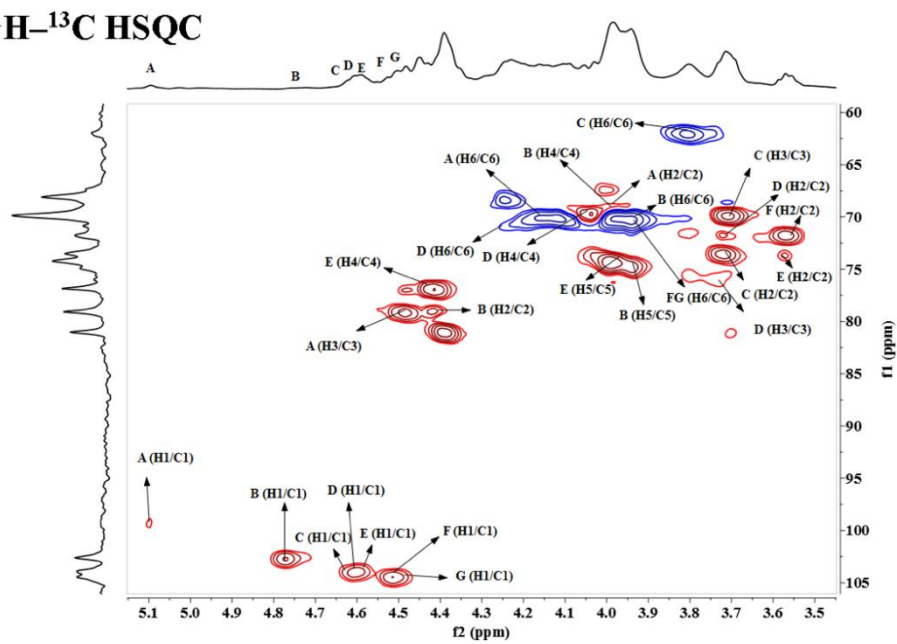

# $^1\text{H}$ - $^{13}\text{C}$ HMBC

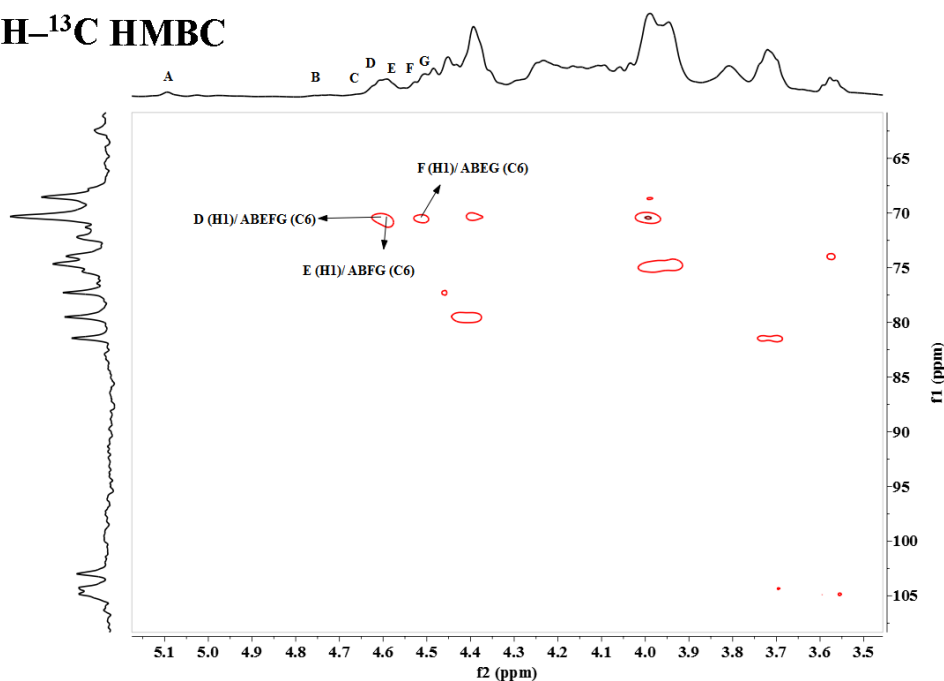

# $^1\text{H}$ - $^1\text{H}$ NOESY

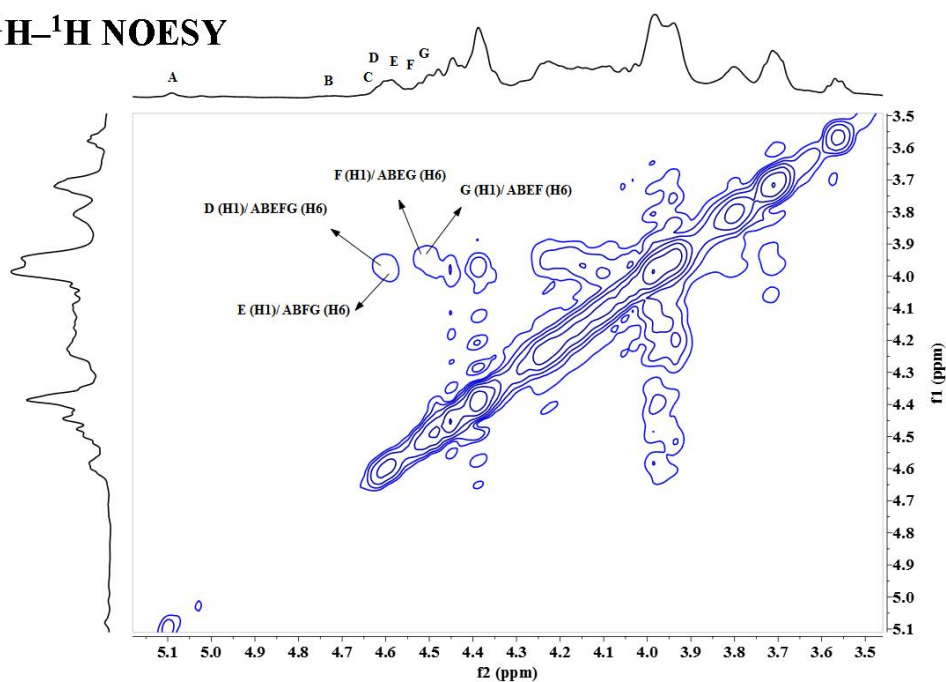

**Figure S2.** NMR spectra of OCSH4. Spectra were performed on an Agilent DD2 500M NMR spectrometer. Chemical shifts are referenced to internal acetone at 2.225 ppm for  $^1\text{H}$  and 31.07 ppm for  $^{13}\text{C}$ . A:  $\rightarrow 6$ )- $\alpha$ -D-Glcp(3SO<sub>4</sub>)-(1 $\rightarrow$ ; B:  $\rightarrow 6$ )- $\beta$ -D-Galp(2SO<sub>4</sub>)-(1 $\rightarrow$ ; C:  $\beta$ -D-Galp-(1 $\rightarrow$ ; D:  $\rightarrow 3$ )- $\beta$ -D-Galp(6SO<sub>4</sub>)-(1 $\rightarrow$ ; E:  $\rightarrow 6$ )- $\beta$ -D-Galp(4SO<sub>4</sub>)-(1 $\rightarrow$ ; F:  $\rightarrow 3,6$ )- $\beta$ -D-Galp-(1 $\rightarrow$ ; G:  $\rightarrow 6$ )- $\beta$ -D-Galp-(1 $\rightarrow$ . Glcp: glucopyranose, Galp: galactopyran
